# Supplementary material
Source: publisher site journal article supplement (https://www.dovepress.com/article/262408)
Supplement: Supplementary file 1 [file get_supplementary_file.php]

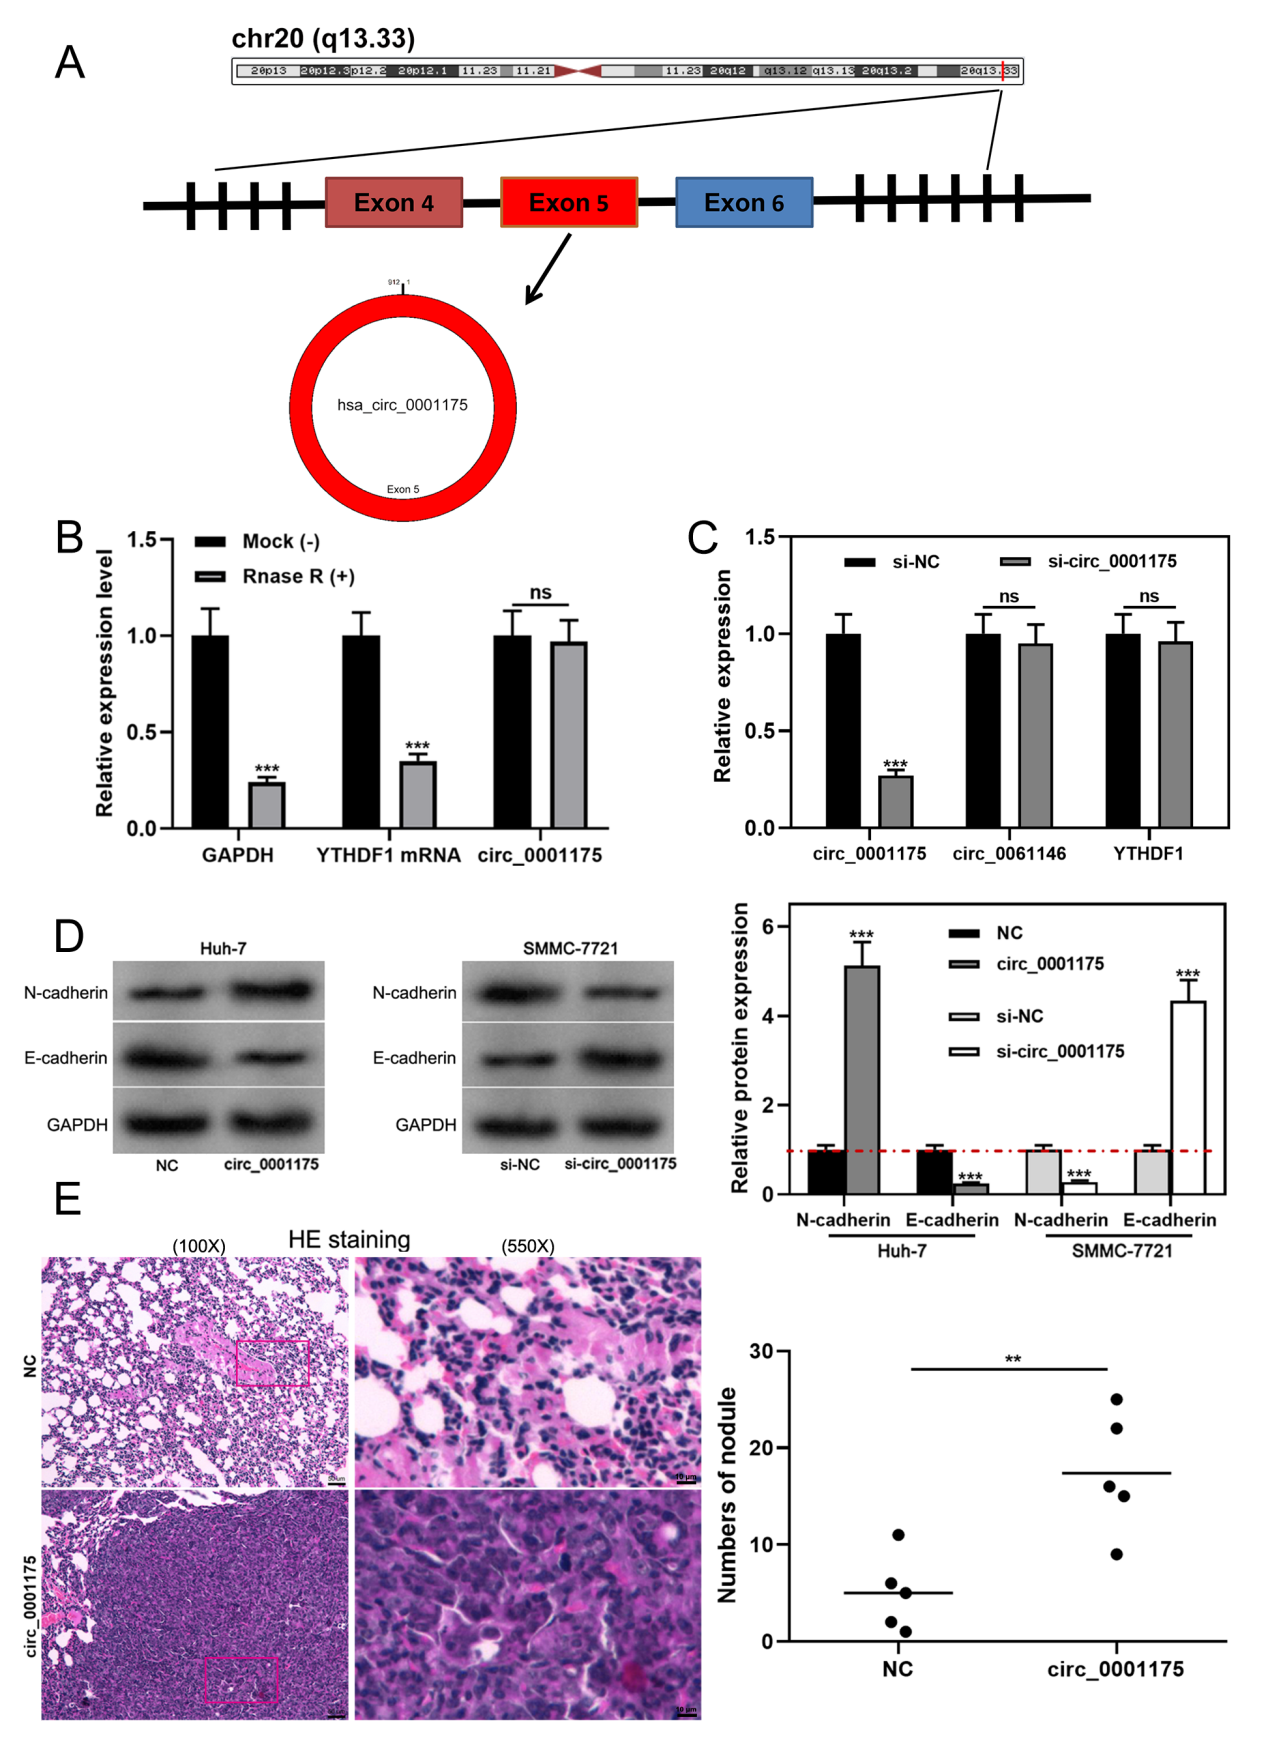


***Supplementary Figure 1***

1. The schematic diagram of circ_0001175 generation.
2. RT-qPCR assay indicated that circ_0001176 was more resistant to RNase R, compared with YTHDF1 mRNA and GAPDH mRNA.
3. Circ_0001175 siRNA (or control siRNA) was transfected into Huh-7 cells, and then the expressions of circ_0001175, circ_0061146 and YTHDF1 mRNA were detected by RT-qPCR.

D. Western blot was used to detected the expression of N-cadherin and E-cadherin in HCC cells after circ_0001175 was overexpressed or knocked down.

E. Lung metastasis of HCC cells *in vivo* was evaluated after the nude mice were injected with Huh-7 cells (control group or circ_0001175 overexpression group). The ordinate indicates the number of nodules per section.


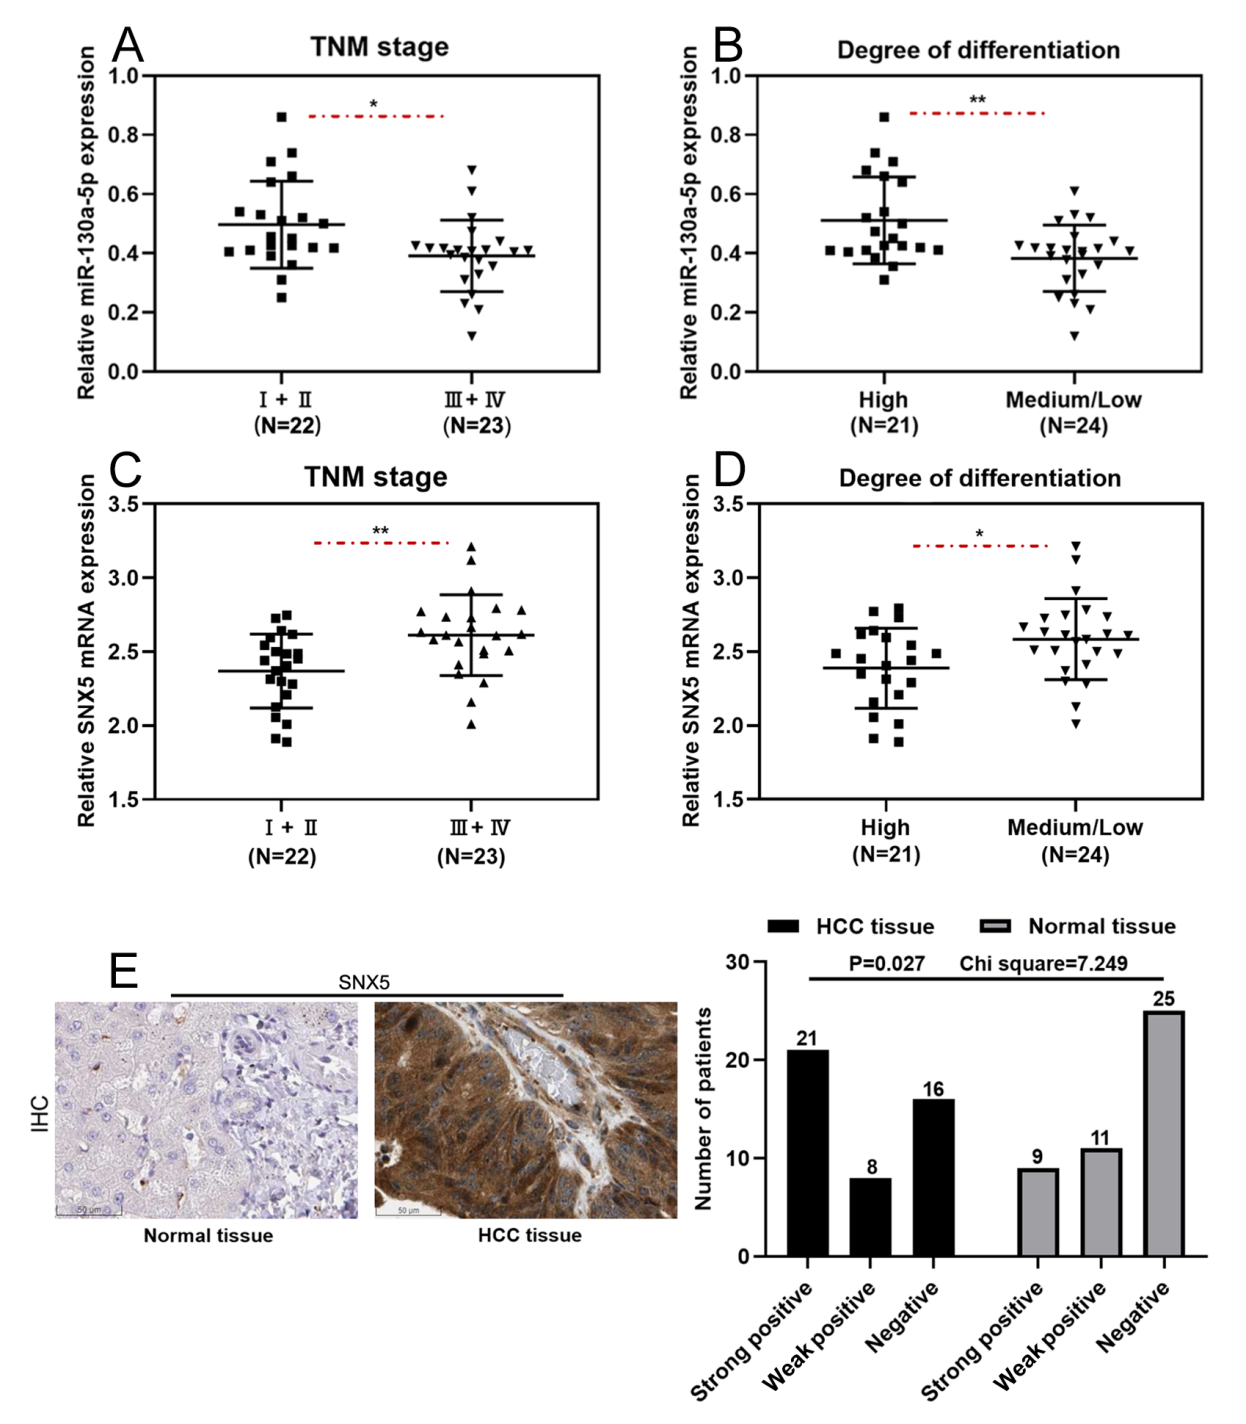


***Supplementary Figure 2***

A-B. Relationship between miR-130a-5p expression and TNM stage and tumor differentiation of HCC patients.

C-D. Relationship between SNX5 mRNA expression and TNM stage and tumor differentiation of HCC patients.

E. IHC was performed to evaluate the expression of SNX5 protein in HCC samples.
